# Supplementary material for: Breaking Barriers: AI’s Influence on Pathology and Oncology in Resource-Scarce Medical Systems
Source: MDPI journal article supplement (doi:10.3390/cancers15235692), 2023-12-02
Supplement: s1 [file s1]

| Reference           | Study objective          | Description                                                                                                            | Model                                 | Results                                                           |
|---------------------|--------------------------|------------------------------------------------------------------------------------------------------------------------|---------------------------------------|-------------------------------------------------------------------|
| Kanavati, 2021 [13] | Tumor classification     | Classify transbronchial biopsies into adenocarcinoma, squamous cell carcinoma, small cell carcinoma and non-neoplastic | EfficientNet-B1                       | AUC 0.94-0.99                                                     |
| Yang, 2021 [14]     | Tumor classification     | Six-category classification for main types of lung cancer and tuberculosis, organizing pneumonia and normal lung       | EfficientNet-B5                       | AUC 0.918-0.978                                                   |
| Iizuka, 2020 [15]   | Tumor classification     | Classification of gastrointestinal biopsies into adenocarcinoma, adenoma and non-neoplastic in both stomach and colon  | Inception v3                          | AUC 0.96-0.99                                                     |
| Byeon, 2022 [16]    | Tumor classification     | Six-class classification for main types of benign colonic polyps as well as colorectal cancer                          | DenseNet-161                          | Accuracy 97.3%                                                    |
| Bulten, 2020 [9]    | Tumor classification     | Classification of prostate biopsies into benign versus malignant and Gleason grading                                   | U-Net                                 | AUC 0.99 for benign versus malignant                              |
| Bulten, 2021 [17]   | Tumor classification     | Agreement of pathologists when grading prostate cancer with AI                                                         | U-Net                                 | Cohen's kappa 0.799 vs 0.872 with AI                              |
| Lu, 2021 [18]       | Tumor classification     | Predicting origins in metastases of unknown primaries                                                                  | ResNet encoder and attention pooling  | Top-3 agreement of 82%                                            |
| Wu, 2023 [23]       | Biomarker quantification | HER2 scoring                                                                                                           | CNN                                   | Accuracy 0.93 with AI vs 0.8 without AI                           |
| Wang, 2021 [24]     | Biomarker quantification | PD-L1 scoring in breast cancer                                                                                         | Linknet                               | Concordance improved from 0.674 to 0.950                          |
| Naso, 2021 [26]     | Biomarker quantification | PD-L1 scoring in NSCLC                                                                                                 | Random trees classifier               | Concordance of 0.925 in automated scoring                         |
| Liu, 2021 [27]      | Biomarker quantification | PD-L1 scoring in lung squamous cell carcinoma                                                                          | Res50-UNet                            | MAE 0.865<br>Pearson correlation 0.9436                           |
| Li, 2022 [28]       | Biomarker quantification | Ki-67 scoring                                                                                                          | Inception v3 and ResNet               | Intra-group correlation coefficient 0.905                         |
| Fulawka, 2022 [29]  | Biomarker quantification | Ki-67 scoring                                                                                                          | DenseNet and fuzzy-set interpretation | MAE 0.024                                                         |
| Xu, 2018 [32]       | Survival prediction      | WSI risk and survival prediction for bladder, breast carcinomas and glioblastoma                                       | Graph-based CNNs                      | MAEs: 123.2 for bladder, 167.5 for breast, 303.3 for glioblastoma |

|                          |                                              |                                                                              |                                           |                                      |
|--------------------------|----------------------------------------------|------------------------------------------------------------------------------|-------------------------------------------|--------------------------------------|
| Zhu, 2017<br>[33]        | Survival prediction                          | Survival analysis from WSI patch clustering                                  | CNN                                       | C-index 0.510-0.703                  |
| Vale-Silva, 2021<br>[34] | Survival prediction                          | Survival prediction using WSI, clinical data, CNV, gene and miRNA expression | ResNet-50                                 | Time-dependent C-indexes 0.554-0.988 |
| Coudray, 2021<br>[35]    | Prediction of molecular alterations from H&E | Predict common mutations in NSCLC                                            | Inception v3                              | AUC 0.733-0.856                      |
| Wagner, 2023<br>[36]     | Prediction of molecular alterations from H&E | Prediction of MSI in colorectal cancer                                       | Transformer                               | AUC 0.99<br>NPV 0.99                 |
| Fremond, 2023<br>[37]    | Prediction of molecular alterations from H&E | Prediction of MMR, POLE and p53 alterations in endometrial cancer            | Attention-based                           | AUROC 0.844-0.928                    |
| Chen,2020<br>[38]        | Prediction of molecular alterations from H&E | Prediction of common mutations in HCC                                        | Inception v3                              | AUC 0.71-0.89                        |
| Jiang, 2021<br>[39]      | Prediction of molecular alterations from H&E | Prediction of IDH mutation status in low-grade gliomas                       | ResNet-18                                 | AUC 0.667                            |
| Yan, 2023<br>[40]        | Prediction of molecular alterations from H&E | Prediction of common mutations in bladder cancer                             | Hierarchical deep multi-instance learning | AUC > 0.83                           |
| Qu, 2021<br>[41]         | Prediction of molecular alterations from H&E | Prediction of common mutations in breast cancer                              | ResNet-101                                | AUC 0.729-0.852                      |
| Wang, 2021<br>[42]       | Prediction of molecular alterations from H&E | Prediction of germline BRCA mutations                                        | ResNet                                    | AUC 0.766                            |
| Bourgade, 2023<br>[43]   | Prediction of molecular alterations from H&E | Prediction of somatic BRCA mutations                                         | ResNet                                    | AUC 0.681                            |
| Dolezal, 2021<br>[44]    | Prediction of molecular alterations from H&E | Prediction of BRAF-RAS score in thyroid neoplasms                            | Xception                                  | AUC 0.97-0.99                        |
| Kim, 2022<br>[45]        | Prediction of molecular alterations from H&E | Prediction of BRAF mutation in melanoma                                      | Inception v3 and pathomic features        | AUC 0.89                             |
| Jain, 2020<br>[46]       | Prediction of molecular alterations from H&E | Prediction of TMB high or low status in lung adenocarcinoma                  | Inception v3                              | AUC 0.92                             |
